# Supplementary material
Source: PubMed Central journal article supplement (PMC2758756)

**Supplementary Figure 2.** The PEV (pooled estimate of variance) of samples from the same treatment group (Treatment 1-4) and from pooled replicates (the Pool, omitting biological variability) at different span settings for the lowess fit. Span settings  $<0.15$  results in potential overfitting.

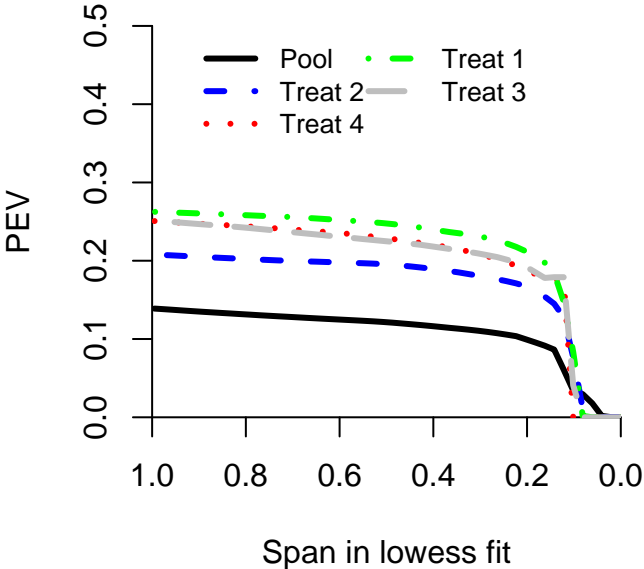

Supplement: M800514-MCP200_3.pdf [file M800514-MCP200_3.pdf]
