# Supplementary material
Source: PubMed Central journal article supplement (PMC2758756)

**Supplementary Figure 3.** The three largest peak clusters in the Mouse dataset for raw, DeCyder and RegrRun normalized data. The data is displayed in the analysis order of the samples. Grey boxplots are technical replicates. The y-axis display  $\log_2$  intensity differences compared to the median peak intensity of block one. For raw and DeCyder normalized data, large fractions of peaks displayed analysis order dependent bias. After applying RegrRun normalization, there was in principle no analysis order dependent bias.

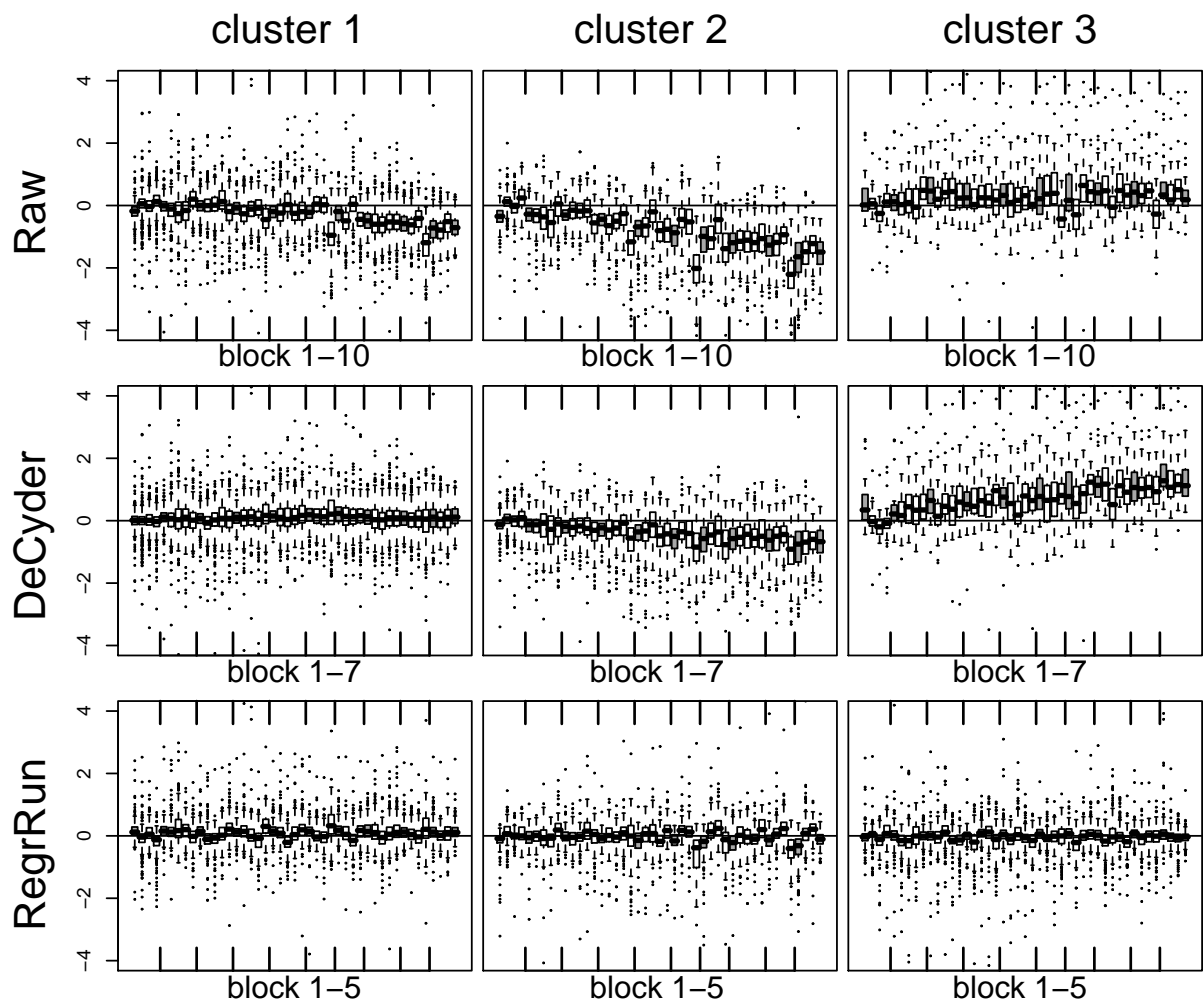

Supplement: M800514-MCP200_4.pdf [file M800514-MCP200_4.pdf]
